# Supplementary material for: Dehydration-triggered magnetic phase conversion in the porous Cu(ii)Mn(iii) metal–organic framework
Source: Royal Society of Chemistry journal article supplement (doi:10.1039/c4dt00222a), 2014-01-01
Supplement: c4dt00222a1.pdf [file c4dt00222a1.pdf]

## Electronic Supplementary Information (ESI)

### Dehydration-triggered magnetic phase conversion in the porous Cu(II)Mn(III) metal-organic framework

Dae Won Ryu,<sup>a</sup> Jin Ho Shin,<sup>a</sup> Kwang Soo Lim,<sup>a</sup> Woo Ram Lee,<sup>a</sup> Won Ju Phang,<sup>a</sup>  
Sung Won Yoon,<sup>b</sup> Byoung Jin Suh,<sup>b</sup> Eui Kwan Koh,<sup>c</sup> and Chang Seop Hong<sup>\*,a</sup>

<sup>a</sup>Department of Chemistry, Korea University, Seoul 136-713, Korea; E-mail: cshong@korea.ac.kr

<sup>b</sup>Department of Physics, The Catholic University of Korea, Buchon 420-743, Korea

<sup>c</sup>Nano-Bio System Research Team, Korea Basic Science Institute, Seoul 136-713, Korea

**[Cu(Tt)<sub>2</sub>][Mn(salen)]<sub>2</sub>(ClO<sub>4</sub>)<sub>2</sub>·7H<sub>2</sub>O** [**1**; Tt = tris(triazolyl)borate, salen = N,N'-ethylenebis(salicylideneiminato) dianion]: [Mn(salen)(H<sub>2</sub>O)](ClO<sub>4</sub>) (36 mg, 0.08 mmol) dissolved in MeCN (10 mL) was mixed with [Cu(Tt)<sub>2</sub>] (20 mg, 0.04 mmol) in H<sub>2</sub>O (10 mL). After stirring for 30 min, the solution was filtered and slowly evaporated at room temperature for 1 week. The dark brown crystals were obtained after filtration. Yield: 40%. Elemental analysis (%) calcd for C<sub>44</sub>H<sub>56</sub>B<sub>2</sub>Cl<sub>2</sub>CuMn<sub>2</sub>N<sub>22</sub>O<sub>19</sub>: C 36.12, H 3.86, N 21.06; found: C 35.73, H 3.8, N 20.81.

**[Cu(Tt)<sub>2</sub>][Mn(salen)]<sub>2</sub>(ClO<sub>4</sub>)<sub>2</sub>** (dehydrated phase; **1'**): **1** was heated at 90 °C under vacuum for 1 h. Elemental analysis (%) calcd for C<sub>44</sub>H<sub>42</sub>B<sub>2</sub>Cl<sub>2</sub>CuMn<sub>2</sub>N<sub>22</sub>O<sub>12</sub>: C 39.53, H 3.17, N 23.05; found: C 39.51, H 3.34, N 23.10. The resolvated phase was obtained by soaking **1'** in H<sub>2</sub>O for 7 days.

**Physical Measurements.** Elemental analyses for C, H and N were performed at the Elemental Analysis Service Center of Sogang University. Infrared spectra were obtained from Nujol mull with a Bomem MB-104 spectrometer. Thermogravimetric analyses were carried out at a ramp rate of 10 °C/min in a N<sub>2</sub> flow using a Scinco TGA N-1000 instrument. PXRD data were recorded using Cu Kα (λ = 1.5406 Å) on a Rigaku Ultima III diffractometer with a scan speed of 2°/min and a step size of 0.02°. Magnetic susceptibility for **1** and **1'** were carried out using a Quantum Design SQUID susceptometer (dc) and a PPMS magnetometer (ac). Diamagnetic corrections of all samples were estimated from Pascal's Tables.

**Gas Sorption Measurements.** Gas sorption isotherms were measured using a BEL Belsorp mini II gas adsorption instrument up to 1 atm of gas pressure. The highly pure N<sub>2</sub> (99.999%), H<sub>2</sub> (99.999%), CO<sub>2</sub> (99.999%), and CH<sub>4</sub> (99.995%) were used in the sorption experiments. N<sub>2</sub> and H<sub>2</sub> gas isotherms were measured at 77 K and CO<sub>2</sub> was measured at 195 K. For N<sub>2</sub> and CO<sub>2</sub> the additional uptake isotherm and CH<sub>4</sub> uptake isotherm was obtained at 273 K.

**Crystallographic Structure Determination.** To determine single crystal structure for **1'**, the sample was prepared as follows. The single crystal of **1** was put in the capillary with one side open and the other side of the entrance blocked. Then, the capillary was put in a vial. The vial was capped with septum and connected to a vacuum line to evacuate the crystal. The vial was placed in an oil bath and heated at 100 °C for 3 hours. After the treatment, the capillary was sealed with a wax in a glove box. X-ray data for **1** and **1'** were collected on a Bruker SMART APEXII diffractometer equipped with graphite monochromated Mo Kα (λ = 0.71073 Å). Preliminary orientation matrix and cell parameters were determined from three sets of ω scans at different starting angles. Data frames were obtained at scan intervals of 0.5° with an exposure time of 10 s per frame. The reflection data were corrected for Lorentz and polarization factors. Absorption corrections were carried out using SADABS. The structures of **1** and **1'** were solved by direct methods and refined by full-matrix least-squares analysis using anisotropic thermal parameters for non-hydrogen atoms with the SHELXTL program. All hydrogen atoms were calculated at idealized positions and refined with the riding models. Crystal data of **1**: Mr = 1490.07, T = 296 K, tetragonal, space group I4<sub>1</sub>/a, a = 36.102(6) Å, c = 9.930(3) Å, V = 12943(5) Å<sup>3</sup>, Z = 8, D<sub>calc</sub> = 1.529 g cm<sup>-3</sup>, μ = 0.880 mm<sup>-1</sup>, 25740 reflections collected, 7662 unique (R<sub>int</sub> = 0.1116), R1 = 0.0716, wR2 = 0.1849 [I > 2σ(I)]. **1'**: Mr = 1336.94, T = 296 K, tetragonal, space group I4<sub>1</sub>/a, a = 35.9978(6) Å, c = 9.9081(3) Å, V = 12839.3(5) Å<sup>3</sup>, Z = 8, D<sub>calc</sub> = 1.383 g cm<sup>-3</sup>, μ = 0.869 mm<sup>-1</sup>, 25947 reflections collected, 7970 unique (R<sub>int</sub> = 0.0644), R1 = 0.0613, wR2 = 0.1607 [I > 2σ(I)].

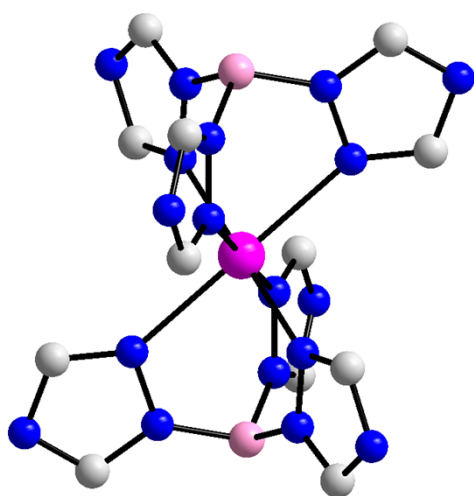

**Fig. S1.** Molecular structure of  $[\text{Cu}(\text{Tt})_2]$ .

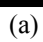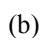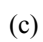

**Fig. S2.** (a) Extended view of **1** in the *ab* plane. Two types of hydrogen-bonded water molecules (denoted as A and B) are in the pores. (b) Perspective view of A highlighting hydrogen-bonded helical water chain s running along the *c* axis. (c) Hydrogen-bonded water clusters of B where the central atom is at the center of a tetrahedron with four corner atoms.

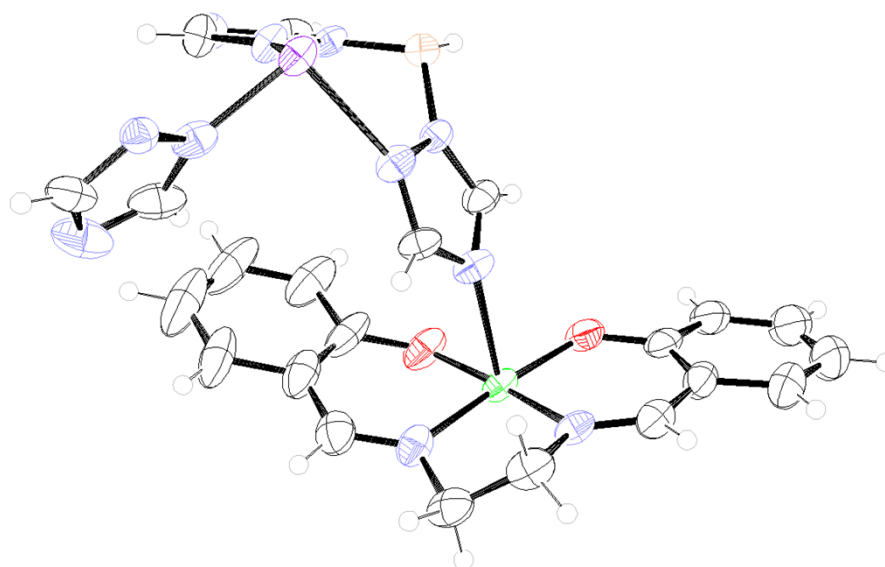

(a)

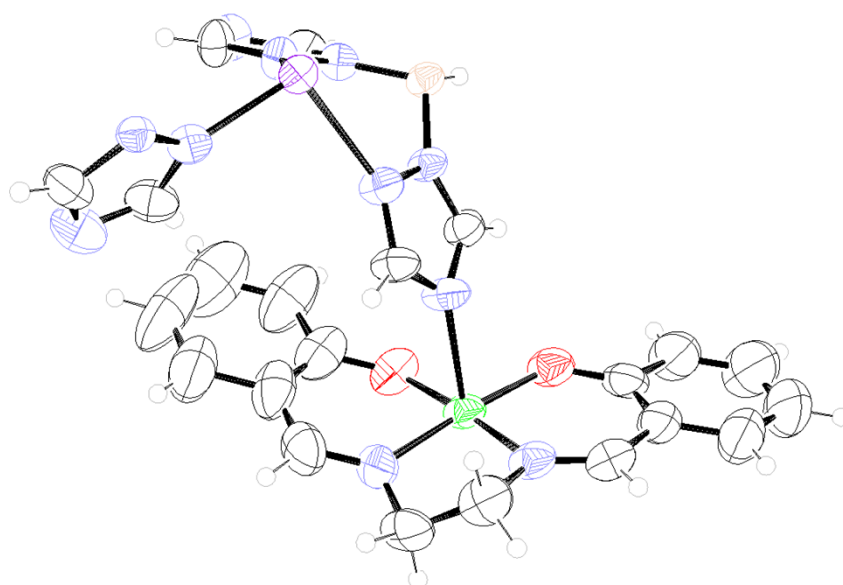

(b)

**Fig. S3.** ORTEP drawing of (a) **1** and (b) **1'** with thermal ellipsoids (C: black, N: blue, O: red, B: brown, Mn: green, and Cu: purple).

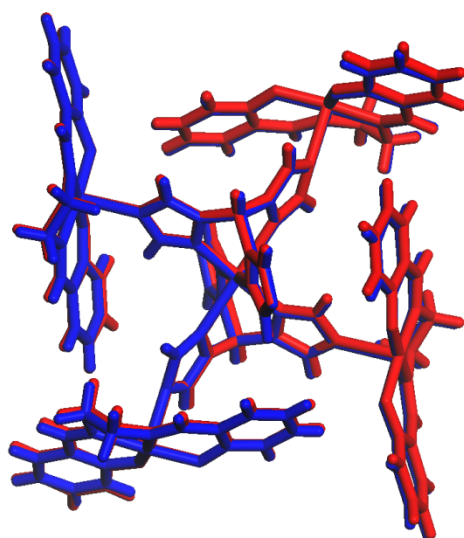

**Fig. S4.** Overlay structure of **1** (red) and **1'** (blue).

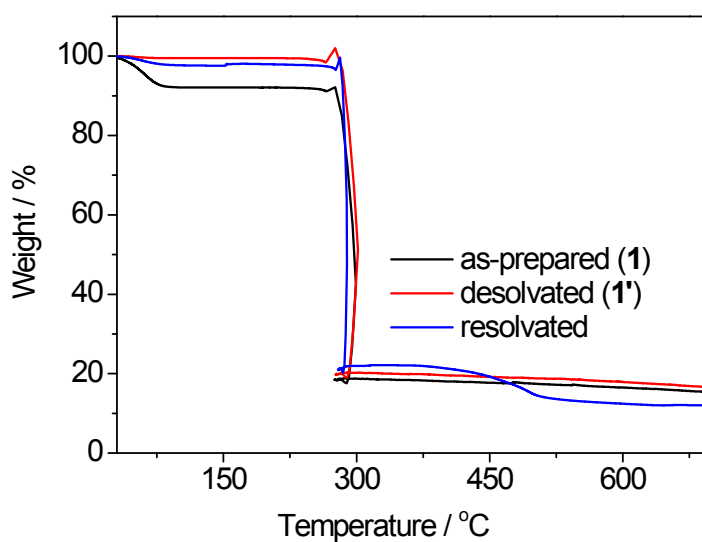

**Fig. S5.** TGA plots of as-prepared (**1**), dehydrated (**1'**), and resolvated samples. The anomaly at around 275 °C is due to the explosive decomposition of  $\text{ClO}_4^-$  anions. The resolvated phase has two water molecules per  $\text{CuMn}_2$ , which can be compared with seven water molecules per  $\text{CuMn}_2$  for **1**.

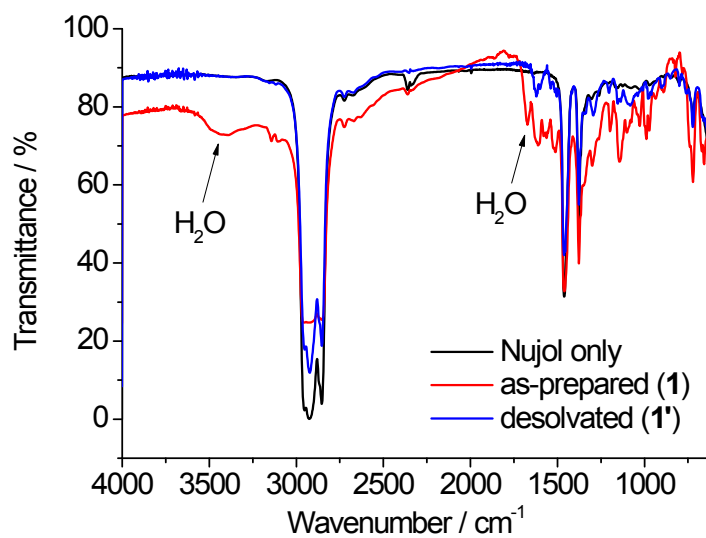

**Fig. S6.** Nujol IR spectra of as-prepared (**1**) and dehydrated (**1'**) samples.

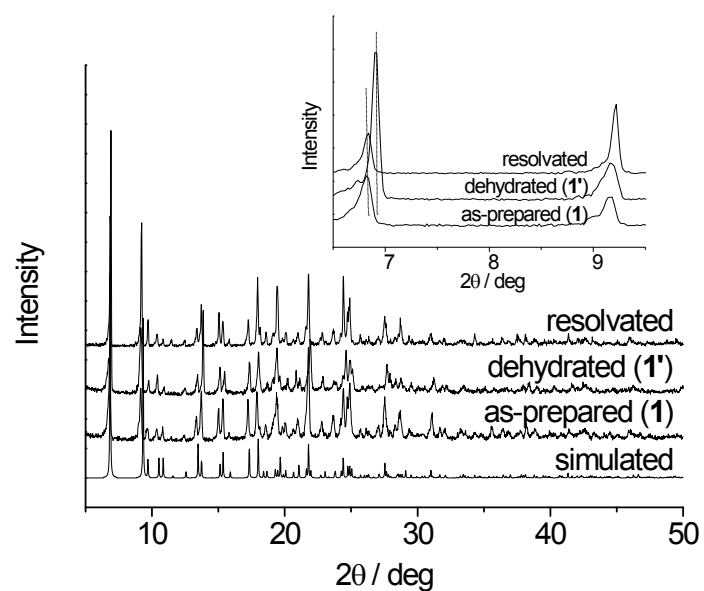

**Fig. S7.** PXRD patterns of the simulated (**1**), as-prepared (**1**), dehydrated (**1'**), and resolvated samples. The inset shows the enlargement of the low angle data.

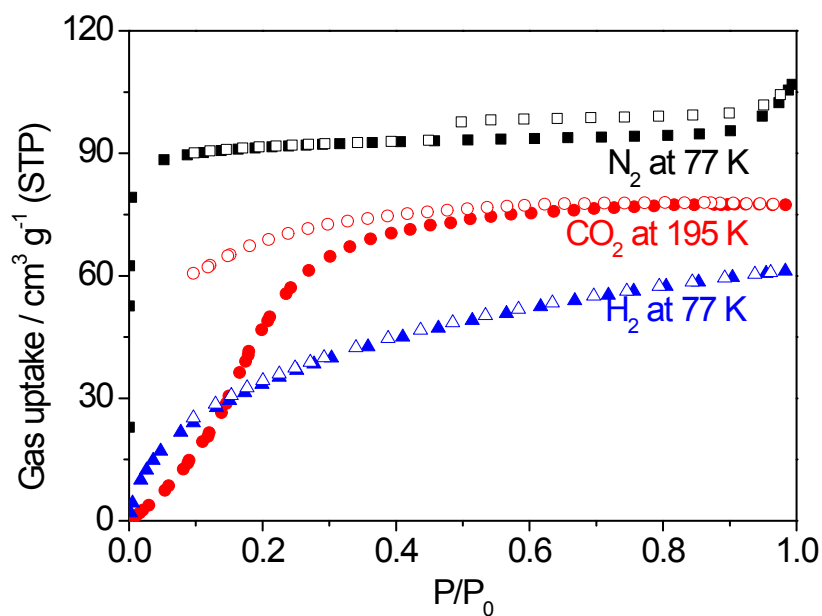

**Fig. S8.** Gas sorption isotherms of  $\text{N}_2$ ,  $\text{H}_2$ , and  $\text{CO}_2$  for **1'**.

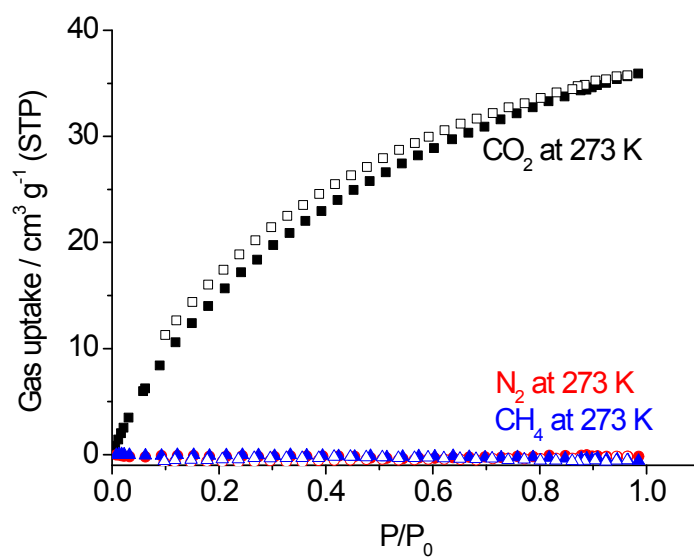

**Fig. S9.** Gas sorption isotherms of  $\text{N}_2$ ,  $\text{CH}_4$ , and  $\text{CO}_2$  at 273 K of **1'**.



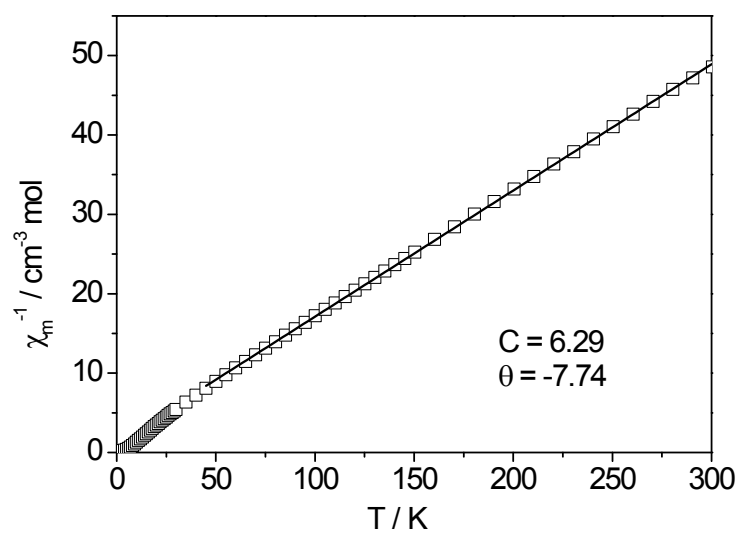

(a)

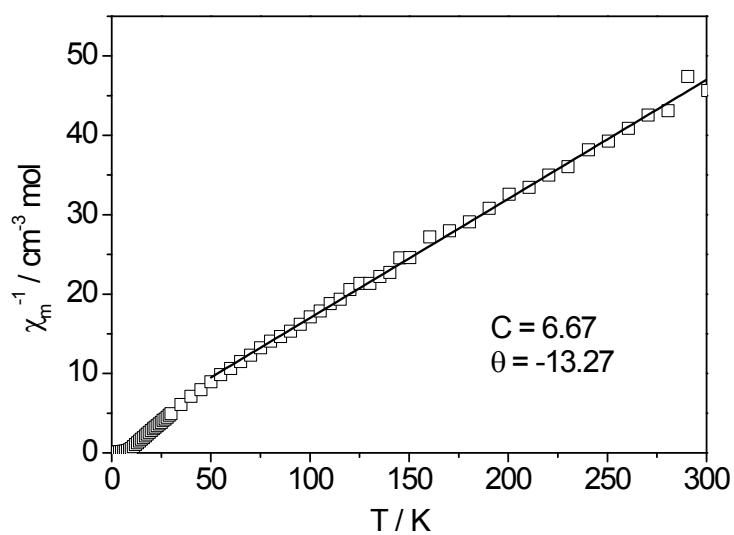

(b)

**Fig. S10.** Plots of  $\chi_m^{-1}$  versus  $T$  for (a) **1** and (b) **1'** at 1000 G. The solid lines represent the best fit of the data to Curie-Weiss law [ $\chi_m = C/(T-\theta)$ ]. The negative values of the Weiss constants ( $\theta$ ) indicate the presence of antiferromagnetic couplings between neighboring spins.

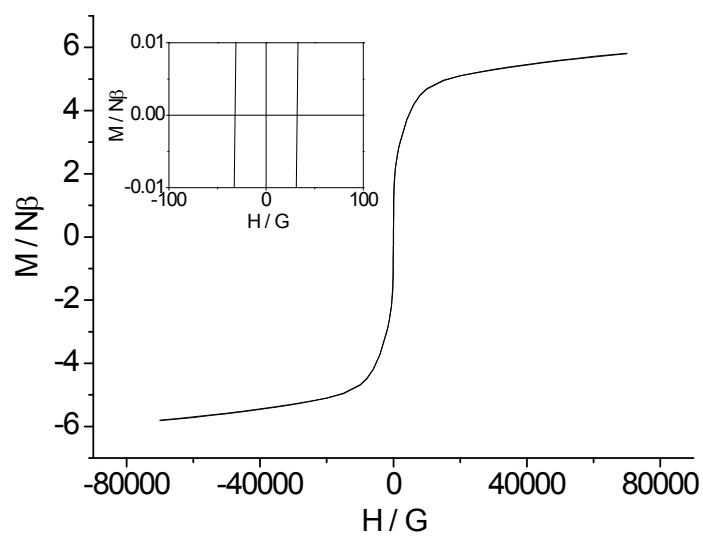

**Fig. S11.** Plot of  $M$  versus  $H$  of **1** at 2 K and the inset shows a blow-up at low fields.

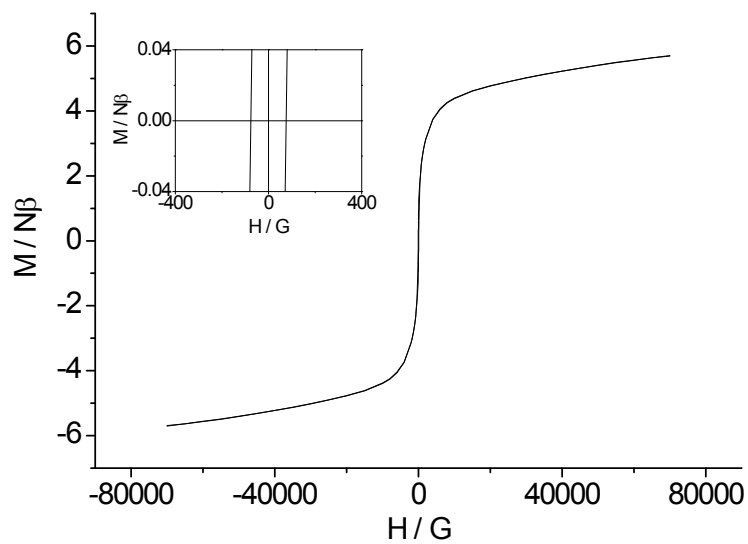

**Fig. S12.** Plot of  $M$  versus  $H$  of **1'** at 2 K and the inset shows a blow-up at low fields.

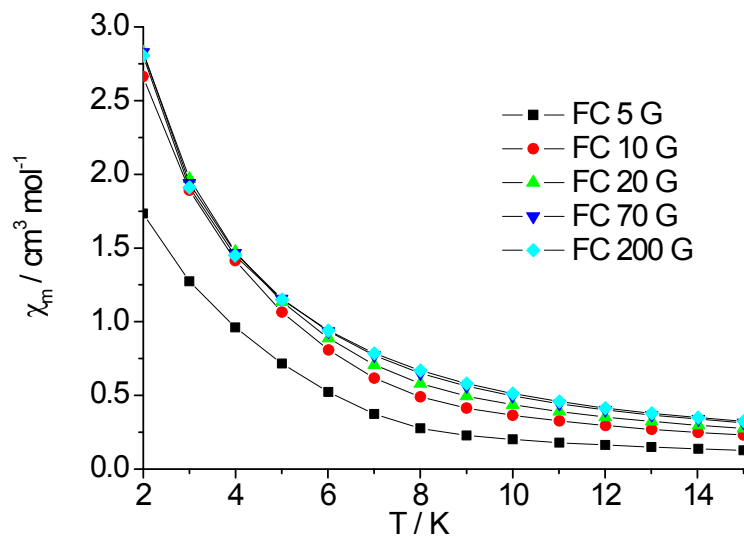

**Fig. S13.** Plots of field-cooled (FC) magnetic susceptibilities versus  $T$  of **1**.

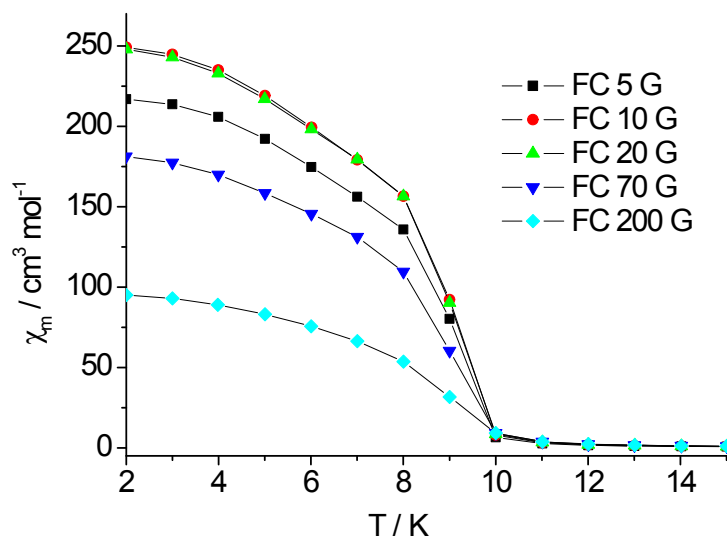

**Fig. S14.** Plots of FC magnetic susceptibilities versus  $T$  of **1'**.

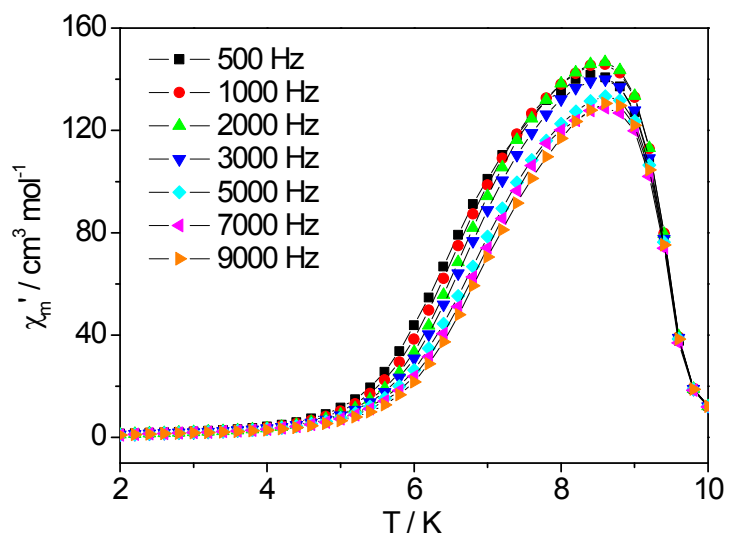

**Fig. S15.** Plots of  $\chi_m'$  versus  $T$  for **1** at indicated frequencies.

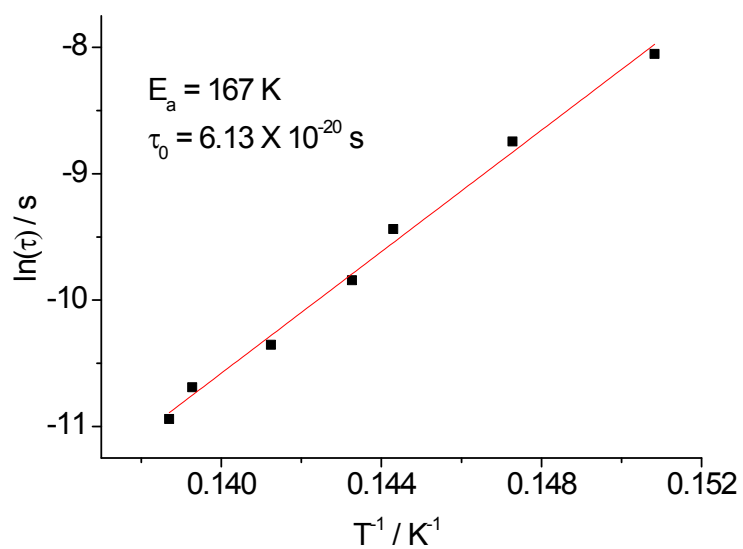

**Fig. S16.** Arrhenius plot for **1**.

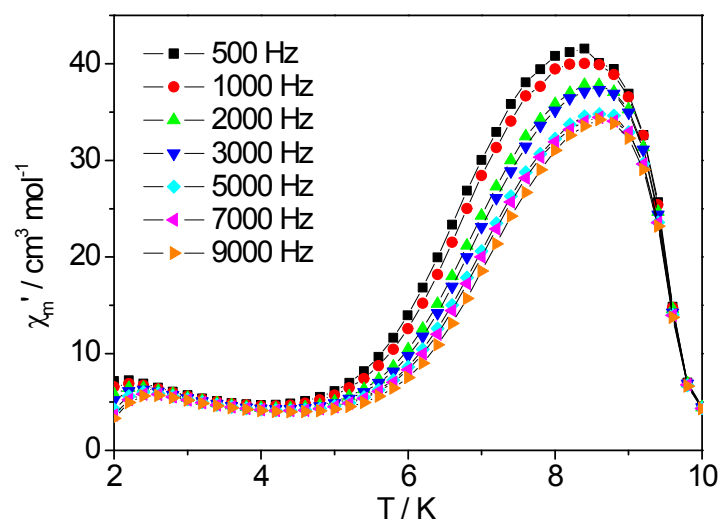

**Fig. S17.** Plots of  $\chi_m'$  versus  $T$  for **1'** at indicated frequencies.

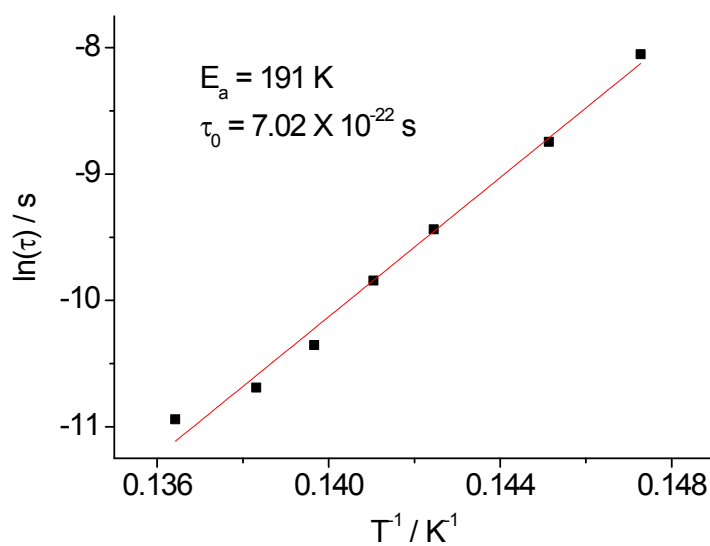

**Fig. S18.** Arrhenius plot for **1'** in the higher temperature region.

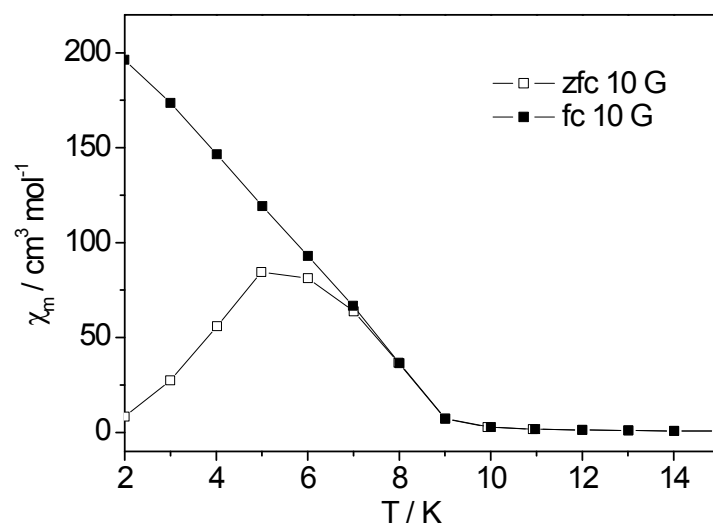

**Fig. S19.** Plot of ZFC/FC curves for the resolved sample at 10 G.

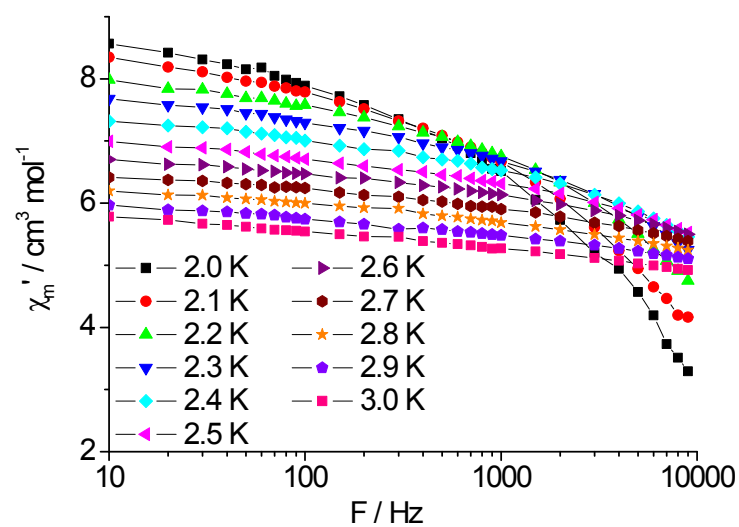

(a)

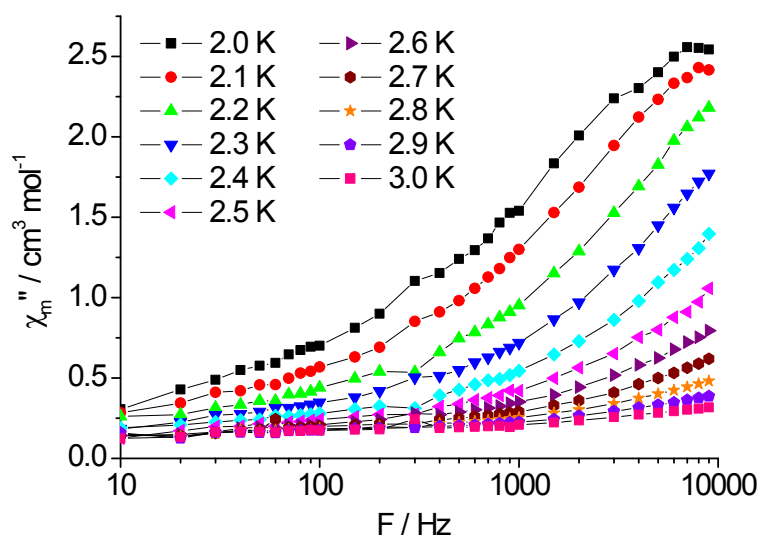

(b)

**Fig. S20.** Plots of (a)  $\chi'_m$  and (b)  $\chi''_m$  versus  $f$  for **1'** at indicated temperatures.

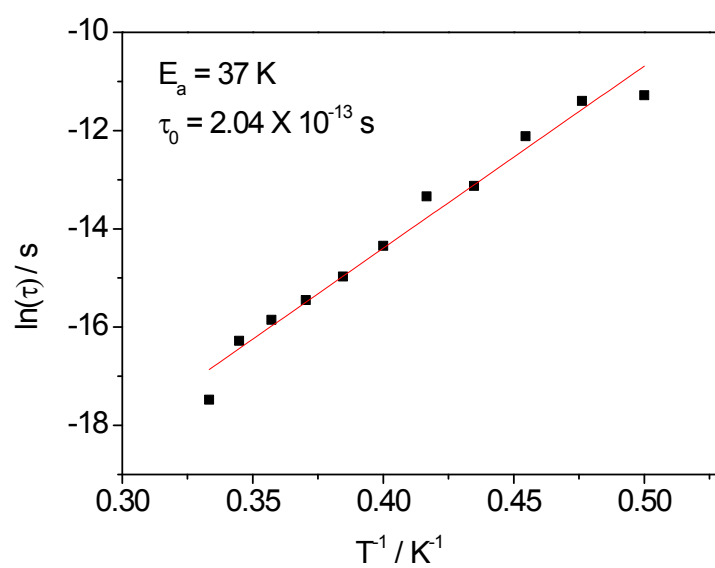

**Fig. S21.** Arrhenius plot for **1'** in the lower temperature region.



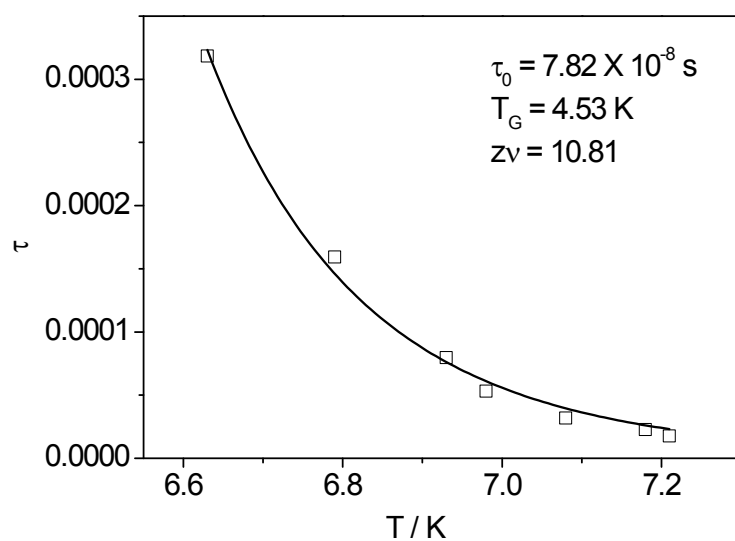

(a)

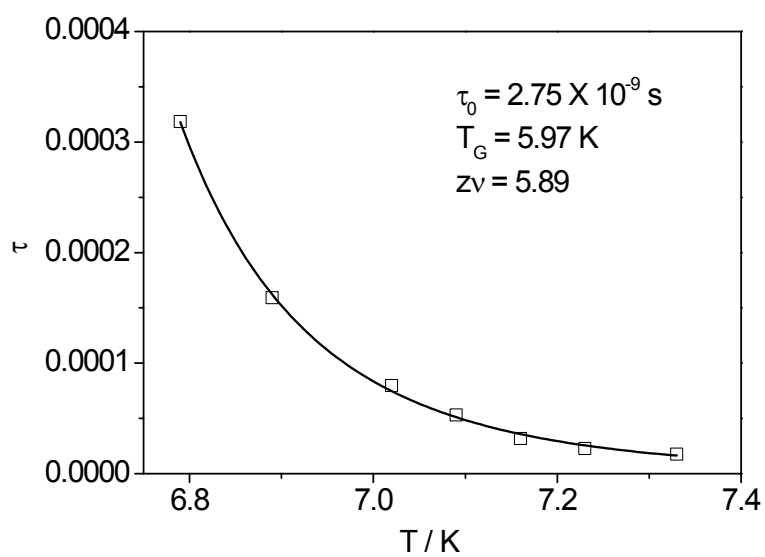

(b)

**Fig. S22.** Plots of  $\tau$  versus temperature for (a) **1** and (b) **1'**. The solid lines represent the best fits of the data to the critical scaling law,  $\tau/\tau_0 = (T_f/T_G - 1)^{-zv}$ . The  $zv$  value falls in the range for spin glasses.
